# Supplementary material for: Relationship between preoperative high intraocular pressure and retinal nerve fibre layer thinning after glaucoma surgery
Source: PubMed Central journal article supplement (PMC6761197; doi:10.1038/s41598-019-50406-7), 2019-09-25
Supplement: 41598_2019_50406_MOESM1_ESM.pdf [file 41598_2019_50406_MOESM1_ESM.pdf]

## Relationship between preoperative high intraocular pressure and retinal nerve fibre layer thinning after glaucoma surgery

Woo-Jin Kim, Kyoung Nam Kim, Jae Yun Sung, Jung Yeul Kim, Chang-sik Kim

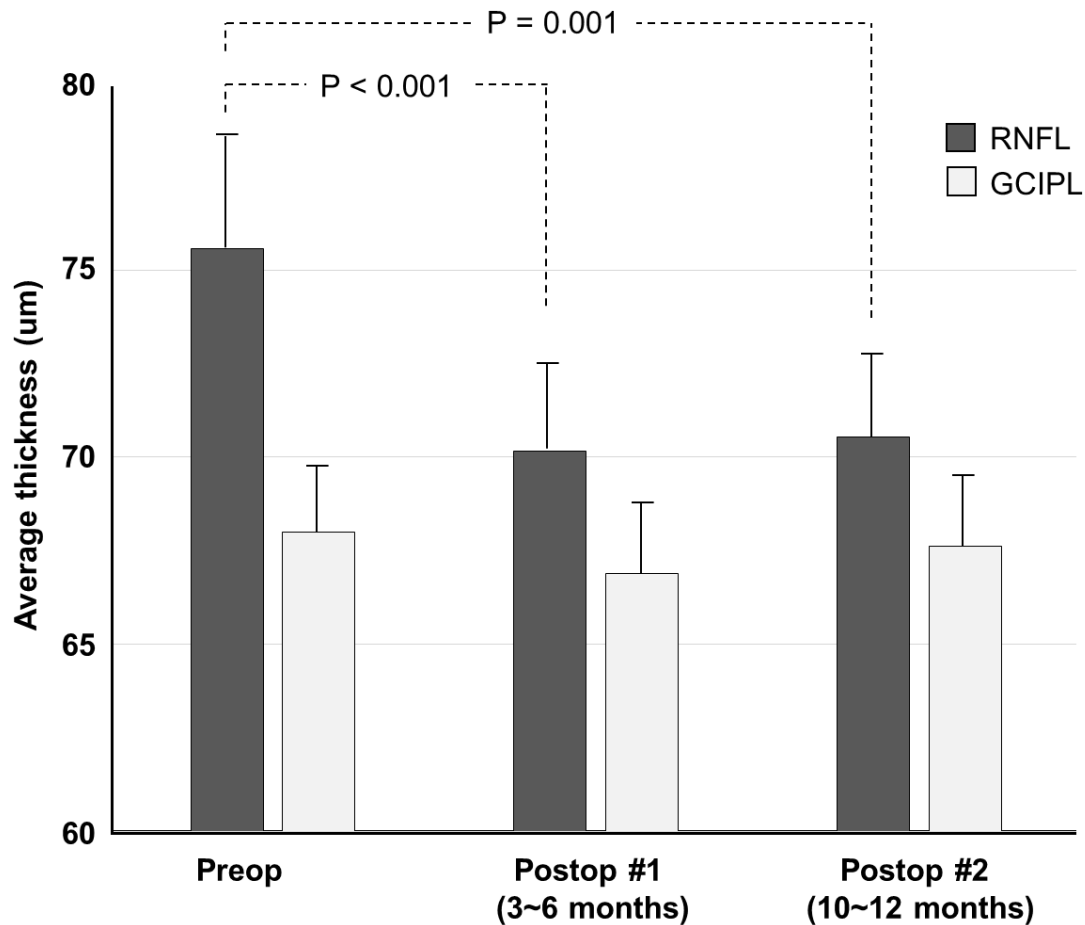

Supplement 1. Average retinal nerve fiber layer (RNFL) thickness and average ganglion cell-inner plexiform layer (GCIPL) thickness preoperatively (Preop), and at 3-6 months postoperatively (Postop #1), and at 10-12 months postoperatively (Postop #2). There were significant differences between Preop RNFL thickness and Postop #1 RNFL thickness ( $p < 0.001$ ), and between Preop RNFL thickness and Postop #2 RNFL thickness ( $p = 0.001$ ). However, there was no significant difference between Postop #1 RNFL thickness and Postop #2 RNFL thickness ( $p = 0.109$ ). The GCIPL thicknesses did not show any significant change; Preop vs. Postop #1 ( $p = 0.145$ ), Preop vs. Postop #2 ( $p = 0.659$ ), and Postop #1 vs. Postop #2 ( $p = 0.409$ ).
