# Supplementary material for: Relationship between preoperative high intraocular pressure and retinal nerve fibre layer thinning after glaucoma surgery
Source: PubMed Central journal article supplement (PMC6761197; doi:10.1038/s41598-019-50406-7), 2019-09-25
Supplement: 41598_2019_50406_MOESM2_ESM.pdf [file 41598_2019_50406_MOESM2_ESM.pdf]

## Relationship between preoperative high intraocular pressure and retinal nerve fibre layer thinning after glaucoma surgery

Woo-Jin Kim, Kyoung Nam Kim, Jae Yun Sung, Jung Yeul Kim, Chang-sik Kim

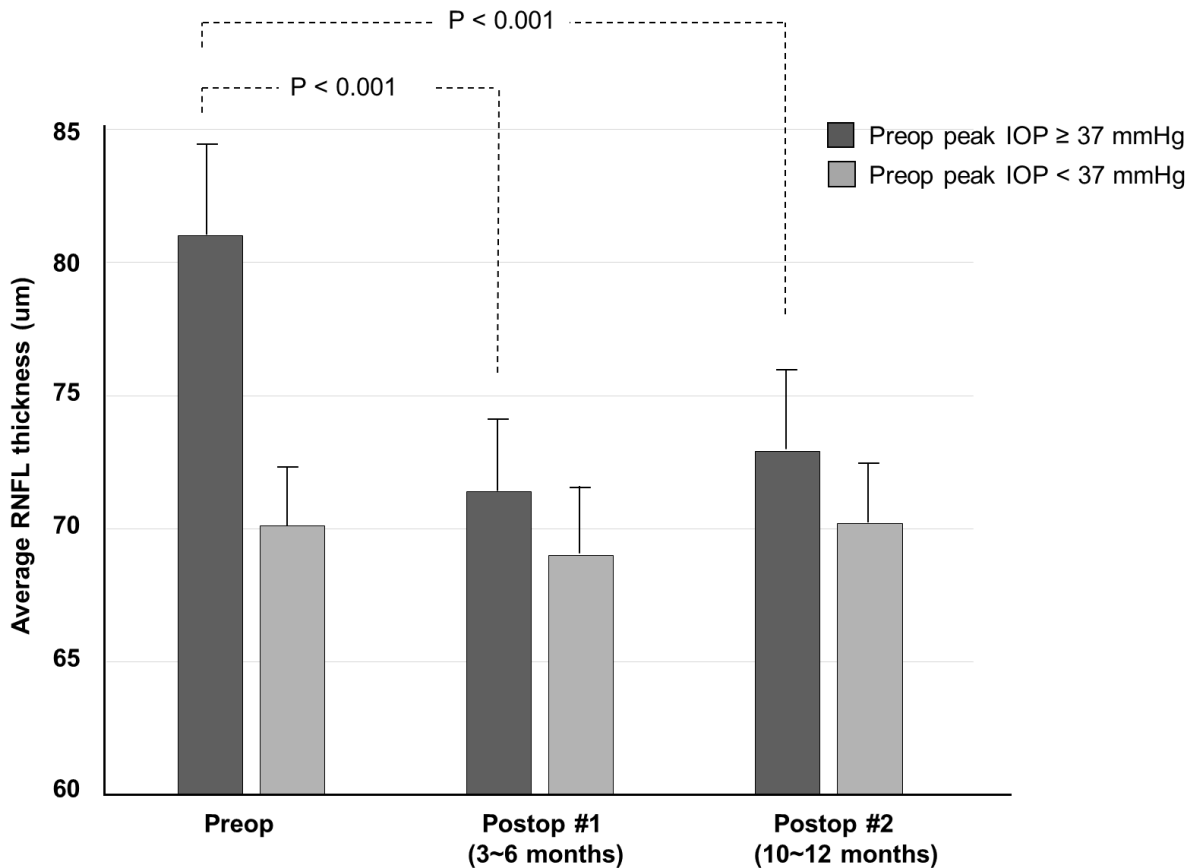

Supplement 2. Average RNFL thickness in patients with preoperative peak intraocular pressure (IOP)  $\geq 37$  mmHg (Preop peak IOP  $\geq 37$  mmHg), and in patients with preoperative peak IOP  $< 37$  mmHg (Preop peak IOP  $< 37$  mmHg), preoperatively (Preop) and at 3~6 months (Postop #1) and at 10~12 months postoperatively (Postop #2). In the Preop peak IOP  $\geq 37$  mmHg group, there were significant differences between Preop and Postop #1 ( $p < 0.001$ ), and between Preop and Postop #2 ( $p < 0.001$ ). However, there was no significant difference between Postop #1 and Postop #2 ( $p = 0.279$ ). In the Preop peak IOP  $< 37$  mmHg group, the RNFL thickness did not show any significant change; Preop vs. Postop #1 ( $p = 0.113$ ), Preop vs. Postop #2 ( $p = 0.935$ ), or Postop #1 vs. Postop #2 ( $p = 0.229$ ).
